# Supplementary material for: Interhospital Spread of blaVIM-1- and blaCTX-M-15-Producing K. pneumoniae ST15 on an IncR Plasmid in Southern Spain
Source: MDPI journal article supplement (doi:10.3390/antibiotics12121727), 2023-12-13

**Supplementary Figure S2:** Matrix of 1133 out of 4891 alleles; not taking into account missing values of *K. pneumoniae* ST15 producing *bla*<sub>VIM-1</sub> and *bla*<sub>CTX-M-15</sub>, the 13 contemporary genomes of ST15 isolates from other centers in the region and the 2 genomes of VIM-1-producing ST15 from Spanish regions other than Andalusia.

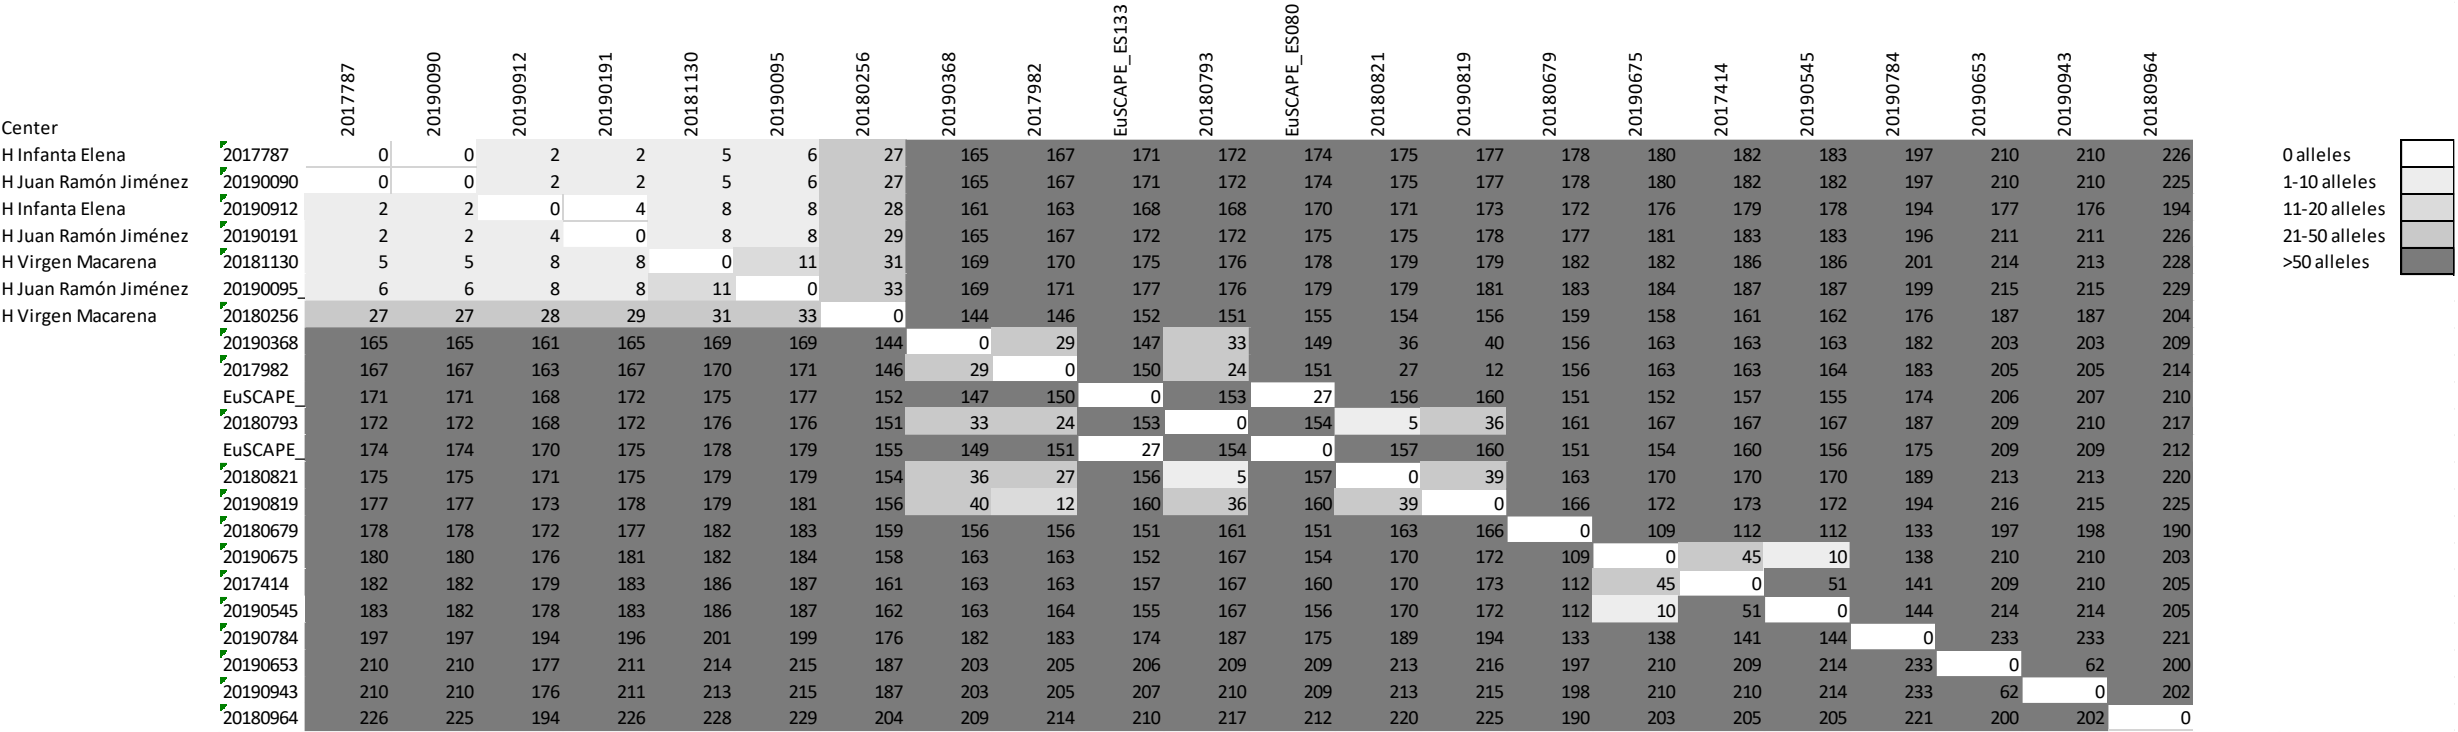

Supplement: s1 [file s1]
