# Supplementary material for: Interhospital Spread of blaVIM-1- and blaCTX-M-15-Producing K. pneumoniae ST15 on an IncR Plasmid in Southern Spain
Source: MDPI journal article supplement (doi:10.3390/antibiotics12121727), 2023-12-13
Supplement: s1 [file s1]

**Supplementary Table S1.** Antimicrobial resistance determinants of *K. pneumoniae* ST15 producing *bla*<sub>VIM-1</sub> and *bla*<sub>CTX-M-15</sub>

| Antimicrobial resistance determinants |                                   |             |                                                              |                      |
|---------------------------------------|-----------------------------------|-------------|--------------------------------------------------------------|----------------------|
| Isolate<br>(n°)                       | <i>B</i> -lactams                 | Quinolones  | Aminoglycosides                                              | Folate<br>antagonist |
| 2017787                               | VIM-1/CTX-M-15/SHV-28/TEM-1/OXA-1 | qnrB1/qnrB2 | aph(3')-Ib/aph(6')-Id/ aac(3)-IIa/aadA1/aadA2                | sul1/sul2/ dfrA12    |
| 20180256                              | VIM-1/CTX-M-15/SHV-28/TEM-1/OXA-1 | qnrB1/qnrB2 | aac(6')-Ib-cr/ aph(3')-Ib/aph(6')-Id/ aac(3)-IIa/aadA1/aadA2 | sul1/sul2/ dfrA12    |
| 20180912                              | VIM-1/CTX-M-15/SHV-28/TEM-1/OXA-1 | qnrB2       | aac(6')-Ib-cr/ aph(3')-Ib/aph(6')-Id/ aac(3)-IIa/aadA1       | sul1/sul2            |
| 20181130                              | VIM-1/CTX-M-15/SHV-28/TEM-1/OXA-1 | qnrB1/qnrB2 | aac(6')-Ib-cr/ aph(3')-Ib/aph(6')-Id/ aac(3)-IIa/aadA1/aadA2 | sul1/sul2/ dfrA12    |
| 20190090                              | VIM-1/CTX-M-15/SHV-28/TEM-1/OXA-1 | qnrB1/qnrB2 | aph(3')-Ib/aph(6')-Id/ aac(3)-IIa/aadA1/aadA2                | sul1/sul2/ dfrA12    |
| 20190095                              | VIM-1/CTX-M-15/SHV-28/TEM-1/OXA-1 | qnrB1/qnrB2 | aac(6')-Ib-cr/ aph(3')-Ib/aph(6')-Id/ aac(3)-IIa/aadA1/aadA2 | sul1/sul2/ dfrA12    |
| 20190191                              | VIM-1/CTX-M-15/SHV-28/TEM-1/OXA-1 | qnrB1/qnrB2 | aac(6')-Ib-cr/ aph(3')-Ib/aph(6')-Id/ aac(3)-IIa/aadA1/aadA2 | sul1/sul2/ dfrA12    |
