# Supplementary material for: Interhospital Spread of blaVIM-1- and blaCTX-M-15-Producing K. pneumoniae ST15 on an IncR Plasmid in Southern Spain
Source: MDPI journal article supplement (doi:10.3390/antibiotics12121727), 2023-12-13

Supplementary Figure S1: Clonal relatedness of *Xba*I-digested DNA by pulsed-field gel electrophoresis analysis (PFGE).

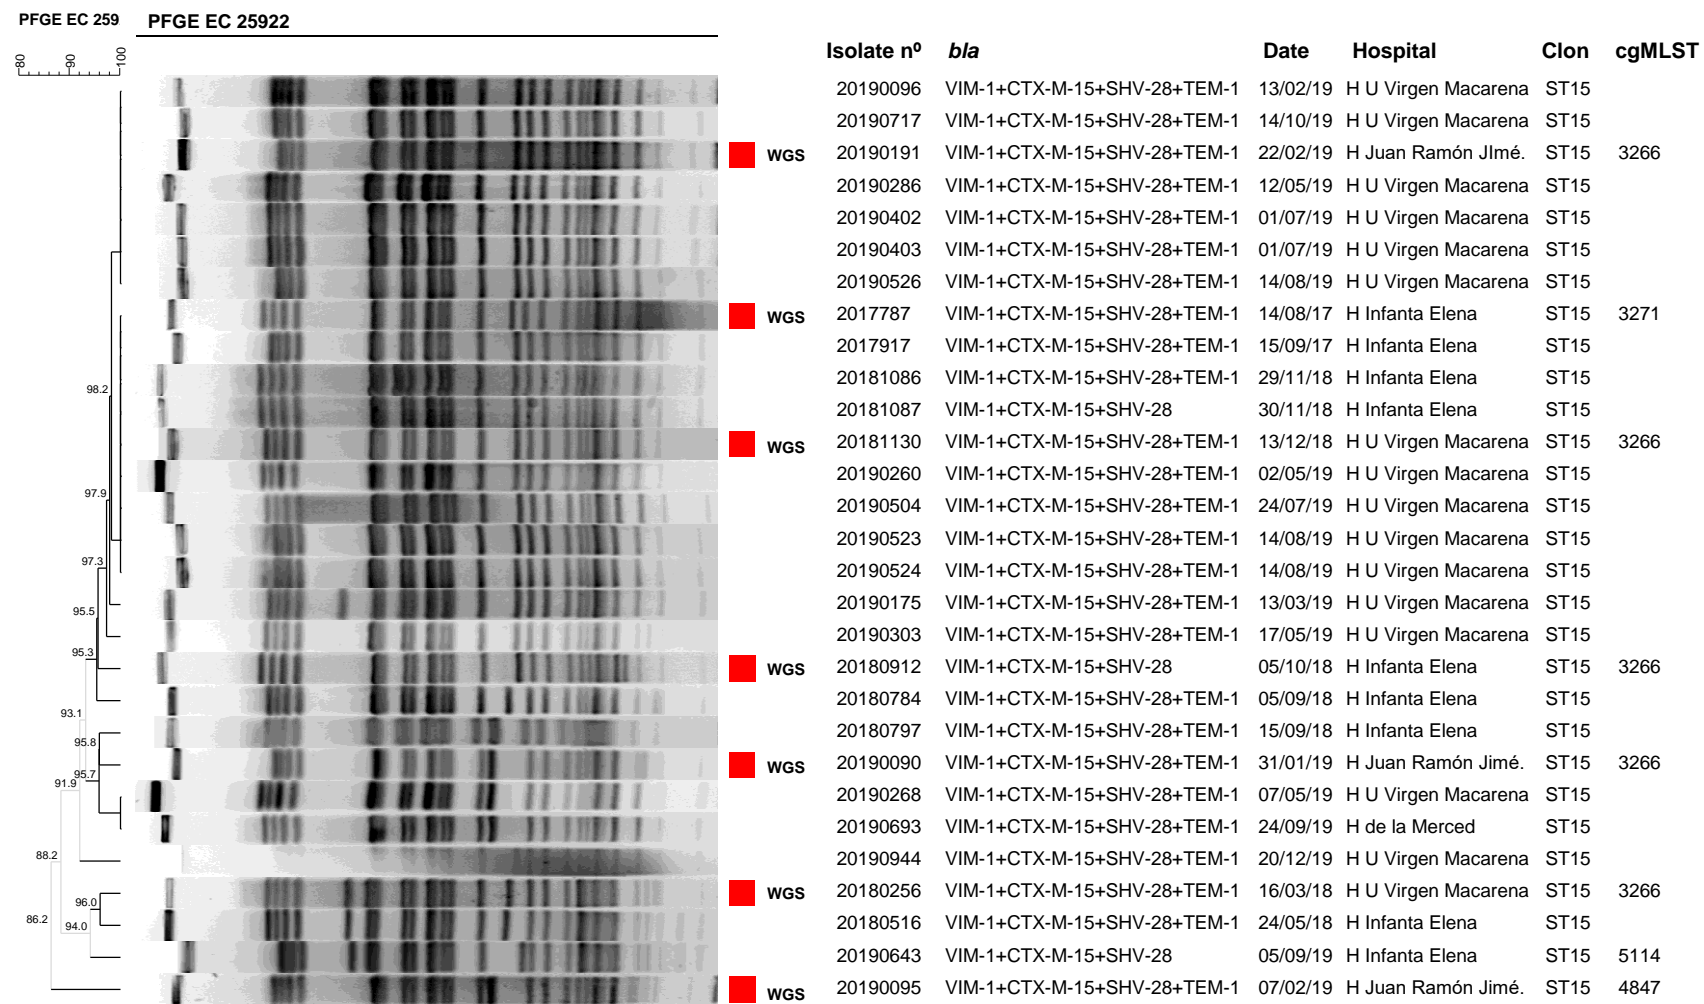

Supplement: s1 [file s1]
